# Supplementary material for: One-pot fabrication of a double Z-scheme CeCO3OH/g-C3N4/CeO2 photocatalyst for nitrogen fixation under solar irradiation
Source: Royal Society of Chemistry journal article supplement (doi:10.1039/c9cy00281b), 2019-01-01
Supplement: c9cy00281b1.pdf [file c9cy00281b1.pdf]

## Electronic Supplementary Information

One-pot fabrication of double Z-scheme  $\text{CeCO}_3\text{OH/g-C}_3\text{N}_4/\text{CeO}_2$  photocatalyst for  
nitrogen fixation under solar irradiation

Xiangwen Feng<sup>a</sup>, Huan Chen<sup>a\*</sup>, Fang Jiang<sup>a\*</sup>, Xin Wang<sup>b</sup>

<sup>a</sup> *Key Laboratory of Jiangsu Province for Chemical Pollution Control and Resources Reuse, School of Environmental and Biological Engineering, Nanjing University of Science and Technology, Nanjing 210094, China.*

<sup>b</sup> *Key Laboratory of Soft Chemistry and Functional Materials, Nanjing University of Science and Technology, Ministry of Education, Nanjing 210094, PR China.*

\*Corresponding author: E-mail: [hchen404@njust.edu.cn](mailto:hchen404@njust.edu.cn), [fjiang@njust.edu.cn](mailto:fjiang@njust.edu.cn)

Tel: +86-25-84303209; Fax: +86-25-84315352

**Table S1** The content of elements in CN and 2Ce-CN.

| Element content<br>(wt. %) | CN   | 2Ce-CN |
|----------------------------|------|--------|
| Ce                         | 0    | 13.2   |
| C                          | 34.8 | 26.1   |
| N                          | 61.7 | 44.0   |
| O                          | 4.1  | 13.68  |
| H                          | 2.0  | 1.8    |
| C/N                        | 0.56 | 0.59   |

**Table S2** The binding energy summary of XPS.

| Peak | Binding Energy (eV)                          |                  |                      |        |        |
|------|----------------------------------------------|------------------|----------------------|--------|--------|
|      | CN                                           | CeO <sub>2</sub> | CeCO <sub>3</sub> OH | 2Ce-CN |        |
| Ce   | v                                            | -                | 882.3                | -      | -      |
|      | v <sub>0</sub>                               | -                | -                    | 882.1  | 882.0  |
|      | v <sub>1</sub>                               | -                | 884.7                | 885.8  | 885.6  |
|      | v <sub>2</sub>                               | -                | 888.8                | -      | -      |
|      | v <sub>3</sub>                               | -                | 898.1                | -      | 897.8↓ |
|      | u                                            | -                | 900.8                | -      | -      |
|      | u <sub>0</sub>                               | -                | -                    | 900.2  | 900.4↑ |
|      | u <sub>1</sub>                               | -                | 903.3                | 904.2  | 904.0  |
|      | u <sub>2</sub>                               | -                | 907.3                | -      | -      |
|      | u <sub>3</sub>                               | -                | 916.6                | -      | 916.1↓ |
| O    | Ce-O                                         | -                | 529.4                | -      | 529.0↓ |
|      | O <sub>2</sub> <sup>-</sup> / O <sup>-</sup> | -                | 531.2                | -      | -      |
|      | CO <sub>3</sub> <sup>2-</sup>                | -                | -                    | 531.6  | 531.6  |
|      | H <sub>2</sub> O                             | -                | -                    | 532.2  | 532.2  |
| C    | CO <sub>3</sub> <sup>2-</sup>                | -                | -                    | 289.9  | 289.9  |
|      | N-C=N                                        | 288.4            | -                    | -      | 288.4  |
|      | C <sub>Calibration</sub>                     | 284.8            | -                    | 284.8  | 284.8  |
| N    | C-N=C                                        | 398.8            | -                    | -      | 398.6↓ |
|      | N-(C) <sub>3</sub>                           | 399.7            | -                    | -      | 399.5↓ |
|      | C-N-H                                        | 400.9            | -                    | -      | 400.9  |

**Table S3** BET and pore volume information of CN, CeCO<sub>3</sub>OH, CeO<sub>2</sub>, CeO<sub>2</sub>-CN, and 2Ce-CN.

| Samples                              | CN    | CeCO <sub>3</sub> OH | CeO <sub>2</sub> | CeO <sub>2</sub> -CN | 2Ce-CN |
|--------------------------------------|-------|----------------------|------------------|----------------------|--------|
| BET Surface Area (m <sup>2</sup> /g) | 7.24  | 17.43                | 9.34             | 14.74                | 61.14  |
| Pore Volume (cm <sup>3</sup> /g)     | 0.056 | 0.017                | 0.047            | 0.086                | 0.208  |

**Table S4** Kinetic analysis of emission decay for CN, CeO<sub>2</sub>-CN, and 2Ce-CN.

| Sample        | CN    | CeO <sub>2</sub> -CN | 2Ce-CN |
|---------------|-------|----------------------|--------|
| $\tau_1$ (ns) | 1.59  | 1.28                 | 3.02   |
| Rel (%)       | 100   | 41.11                | 47.48  |
| $\tau_2$ (ns) | -     | 4.74                 | 7.54   |
| Rel (%)       | -     | 47.25                | 28.65  |
| $\tau_3$ (ns) | -     | 25.61                | 37.67  |
| Rel (%)       | -     | 11.63                | 23.87  |
| $\tau$ (ns)   | 1.59  | 5.73                 | 12.55  |
| $\chi^2$      | 1.071 | 1.29                 | 1.079  |

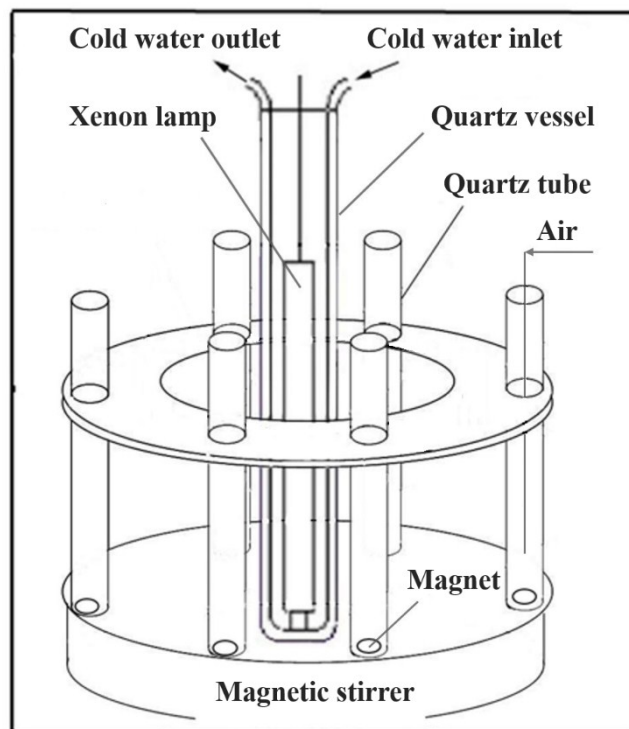

**Fig. S1** Photocatalytic nitrogen fixation reaction device

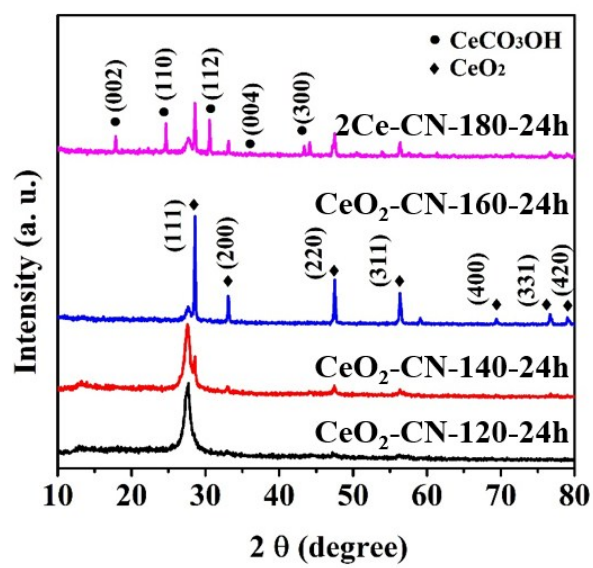

Fig. S2 XRD diffraction patterns of CeO<sub>2</sub>-CN and 2Ce-CN prepared in different temperature.

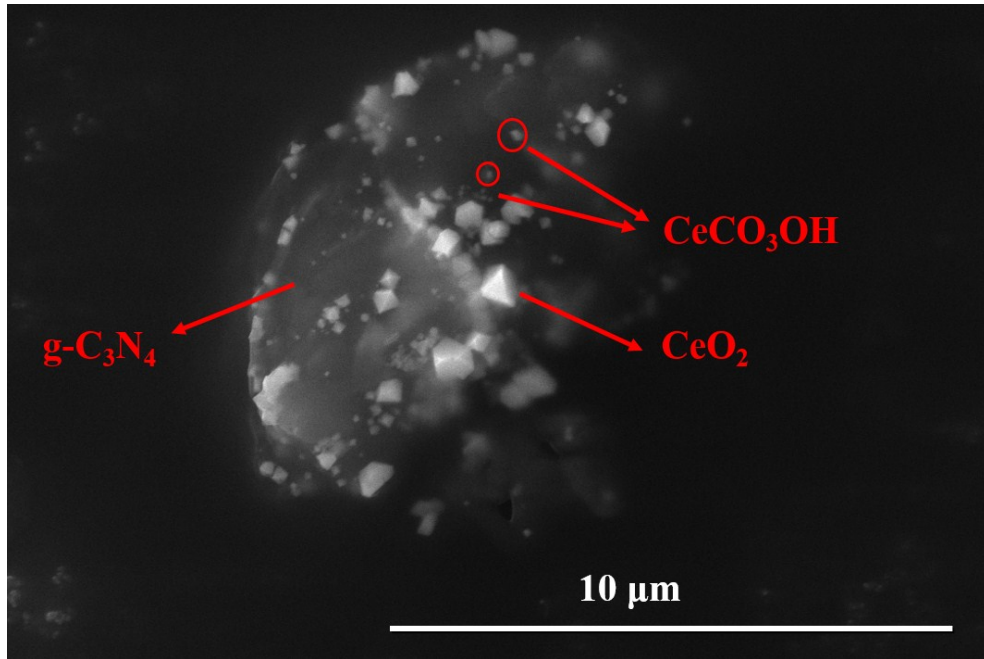

**Fig. S3** SEM image of 2Ce-CN.



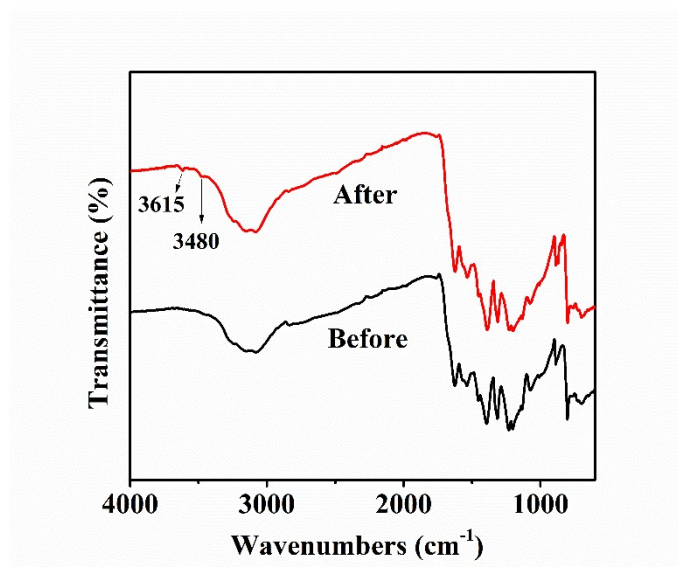

**Fig. S4** FT-IR spectra of 2Ce-CN before and after reaction.

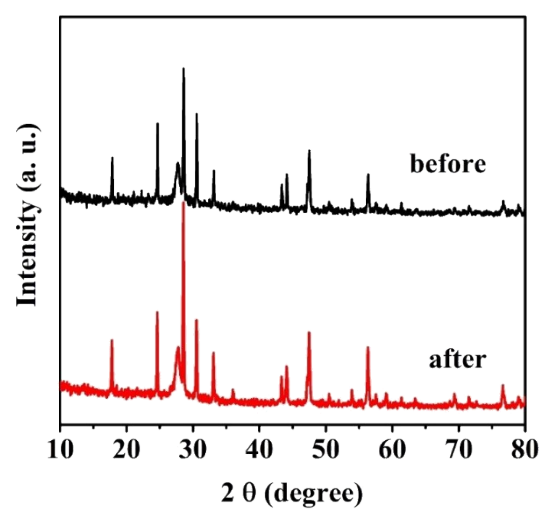

**Fig. S5** XRD patterns of 2Ce-CN before and after being used.

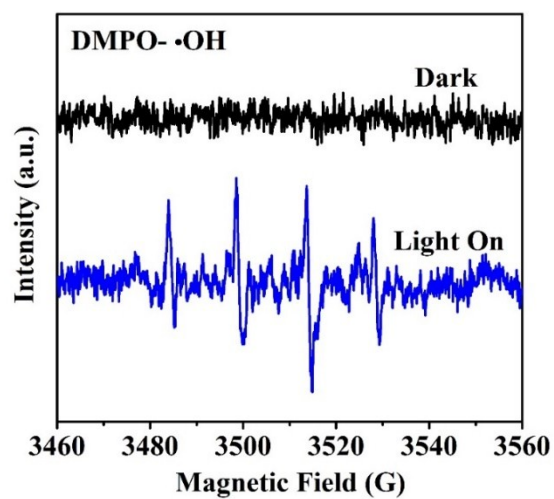

**Fig. S6** The EPR spectra of DMPO-•OH in the presence of CeO<sub>2</sub>-CN.

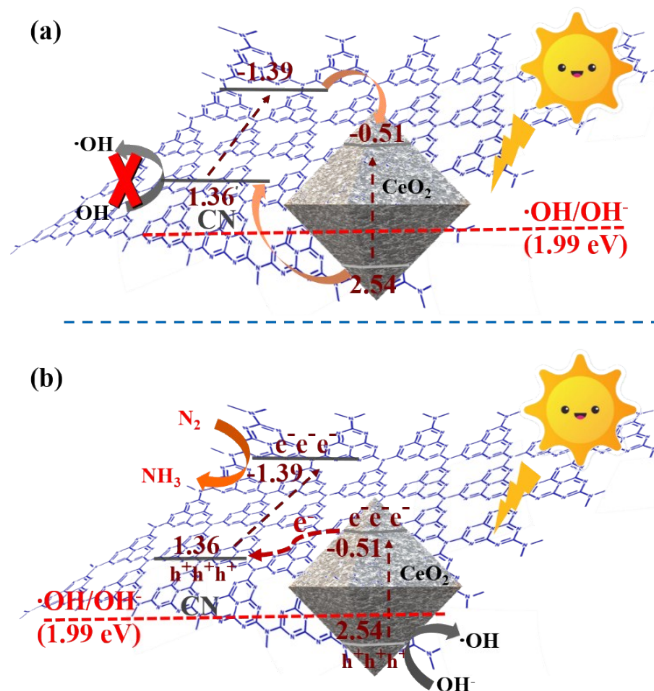

**Fig. S7** Proposed mechanism for charge transfer path over CeO<sub>2</sub>-CN: traditional model (a) and Z-scheme model (b).

The possible charge transfer process over CeO<sub>2</sub>-CN is proposed in Fig S3. In the hypothetical process shown in Fig. S7a, under light irradiation, the holes on the VB of CeO<sub>2</sub> would transfer to that of CN, while the electrons on the CB of CN would transfer towards that of CeO<sub>2</sub>. However, the oxidation levels of CN (1.36) were lower than the standard redox potential of ·OH/OH<sup>-</sup> (1.99 eV). Therefore, the accumulated holes in the VB of CN cannot react with OH<sup>-</sup> to form ·OH. This is not consistent with the experimental results that ·OH was generated in this photocatalytic process. As shown in Fig. S6, EPR spin-trap tests over CeO<sub>2</sub>-CN with DMPO in water gave rise to the characteristic peaks of the DMPO-hydroxyl radical (·OH) moiety, which suggested that ·OH was generated in the photocatalytic process.

Another mechanism is therefore proposed. In the staggered band heterostructure of CeO<sub>2</sub>-CN shown in Fig. S7b, electrons generated in CeO<sub>2</sub> transferred to the VB of CN as a result of the inner electric field, and subsequently recombined with holes. Thus, nitrogen reduction occurred at the CB of CN, meanwhile, ·OH formed at the VB of CeO<sub>2</sub>. This constituted a Z-scheme heterojunction model.

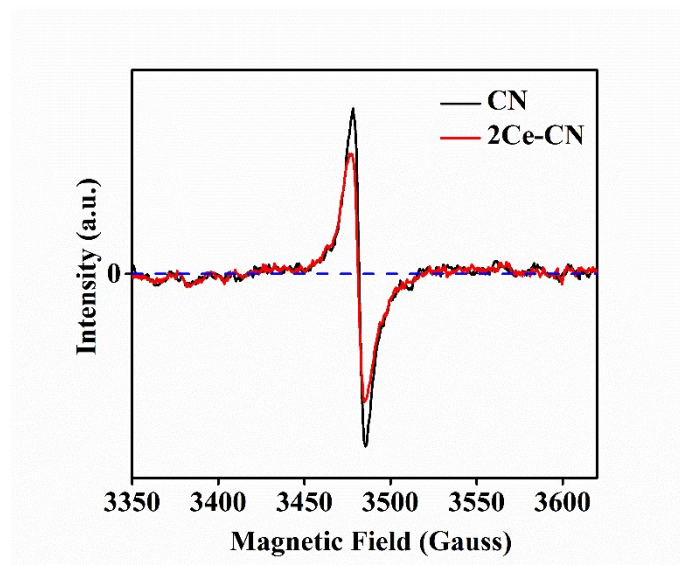

Fig. S8 EPR spectra of CN and 2Ce-CN.
